# Supplementary material for: From Compliance Pressure to Innovation Motivation: Configurational Paths and Causal Mechanisms of Environmental Governance in Enhancing Firm Green Technology Innovation Capability
Source: Research Square preprint supplement (doi:10.21203/rs.3.rs-8017927/v1), 2026-01-21
Supplement: Supplementary file 1 [file 64e27a94ee35820545e5b082.xlsx]

## Sheet: QCA data 
ID	PROVINCE	YEAR	GE	PE	ME	CP	MP	AS	IS	GTIC
1	Beijing	2011	0.0173828	96.7742	0.248782	20	0.28486	0.252823	0.0342705	0.80723
2	Beijing	2012	0.0157128	55.9563	0.299157	28	0.3103	5.59412	0.0323614	0.96186
3	Beijing	2013	0.0200279	931.995	0.328381	28	0.3146	5.07603	0.0392615	0.947903
4	Beijing	2014	0.022834	869.866	0.363256	36	2.4725	6.12774	0.0488248	0.54501
5	Beijing	2015	0.0208298	1118.21	0.36539	46	2.5611	4.31594	0.0497268	0.580724
6	Beijing	2016	0.0262638	990.822	0.422961	75	5.2926	14.5274	0.0398845	0.946906
7	Beijing	2017	0.0232149	981.027	0.449369	81	5.9787	35.914	0.0386011	1.2554
8	Beijing	2018	0.0238818	803.929	0.497259	77	4.4768	90.2629	0.0553153	1.09747
9	Beijing	2019	0.0222222	555.345	0.545492	35	9.6006	141.108	0.0657507	1.33267
10	Beijing	2020	0.0199367	202.511	0.5601	36	9.44	227.702	0.0723352	1.09934
11	Tianjin	2011	0.0144689	57.8065	0.165867	2	1.96438	0.0597341	0.00959357	0.814993
12	Tianjin	2012	0.0142242	24.3907	0.151152	6	1.9214	0	0.0106287	0.00293542
13	Tianjin	2013	0.0140531	203.255	0.183056	7	1.8697	0.0530102	0.0170394	0.328488
14	Tianjin	2014	0.0212302	290.027	0.21852	3	3.6012	0.719566	0.0178731	0.00489237
15	Tianjin	2015	0.0213723	319.405	0.1719	13	5.5385	1.69262	0.0222799	0.179364
16	Tianjin	2016	0.0219966	292.41	0.191158	6	5.307	3.43654	0.0323347	0.0107632
17	Tianjin	2017	0.0174766	251.611	0.219296	22	5.0594	14.6582	0.0355106	0.535814
18	Tianjin	2018	0.0215602	204.389	0.183277	11	3.5768	42.4544	0.0364749	0.474536
19	Tianjin	2019	0.0211858	188.868	0.221595	14	4.3005	42.7828	0.0413973	0.764351
20	Tianjin	2020	0.0168667	91.0464	0.218978	20	3.12	36.2037	0.0465508	0.795455
21	Hebei	2011	0.0149207	73.5806	0.205161	55	14.8737	0	0.00678872	0.351878
22	Hebei	2012	0.0159913	35.388	0.164007	36	16.6539	0	0.00662176	0.335122
23	Hebei	2013	0.0175485	279.493	0.163779	119	16.6499	0	0.0174664	0.0210372
24	Hebei	2014	0.0220644	410.553	0.157051	98	15.1087	0	0.0146177	0.0273973
25	Hebei	2015	0.0246375	464.797	0.160949	82	16.3757	11.7285	0.0197479	0.0249511
26	Hebei	2016	0.0262718	492.598	0.149232	85	16.8701	31.278	0.0279846	0.174166
27	Hebei	2017	0.0227904	389.671	0.19042	154	25.4114	77.6759	0.0501103	0.661559
28	Hebei	2018	0.024254	271.756	0.130928	95	17.5714	148.089	0.0526061	0.363666
29	Hebei	2019	0.0208268	246.392	0.147118	98	27.3146	125.087	0.0640119	0.702166
30	Hebei	2020	0.0197341	125.883	0.167544	78	24.49	149.965	0.0697868	0.756593
31	Shanxi	2011	0.0176145	66.3871	0.196491	27	19.1457	0	0.00639899	0.684186
32	Shanxi	2012	0.014756	26.8552	0.231384	51	12.6524	0	0.00710856	0.346496
33	Shanxi	2013	0.01869	248.17	0.240024	97	15.1279	0	0.0155384	0.262441
34	Shanxi	2014	0.0169654	270.523	0.222962	107	11.4505	0.0590589	0.0121335	0.347964
35	Shanxi	2015	0.0210026	327.123	0.24021	113	9.4039	0.864919	0.0208824	0.173982
36	Shanxi	2016	0.0208255	428.792	0.379407	99	11.1079	1.88106	0.0380526	0.610557
37	Shanxi	2017	0.0229008	523.049	0.263557	209	11.3466	12.4721	0.0512973	0.345028
38	Shanxi	2018	0.021243	311.315	0.206045	134	11.2948	21.4336	0.0514359	0.511672
39	Shanxi	2019	0.0182461	296.46	0.251866	64	14.1788	50.0167	0.0595499	0.689078
40	Shanxi	2020	0.0190343	135.929	0.224531	63	12.6	19.6299	0.0712119	0.00684931
41	Neimenggu	2011	0.0181045	29.3226	0.336068	8	9.18423	0.00603362	0.0135656	0
42	Neimenggu	2012	0.0160677	11.3798	0.34842	16	9.8363	0.0222374	0.0140127	0
43	Neimenggu	2013	0.0171621	114.074	0.378599	26	10.0501	0.121096	0.0227536	0.681251
44	Neimenggu	2014	0.0201395	161.359	0.390893	32	8.789	0.108771	0.0222038	0.000489237
45	Neimenggu	2015	0.0163804	194.055	0.366615	29	7.0695	0.137735	0.0274192	0.342093
46	Neimenggu	2016	0.0153998	162.049	0.331339	32	9.7562	0.0935649	0.0335085	0.40872
47	Neimenggu	2017	0.0194428	163.932	0.33296	49	9.7836	1.22289	0.0374576	0.152639
48	Neimenggu	2018	0.0183784	116.786	0.234932	26	8.6806	6.36282	0.0503509	0.475347
49	Neimenggu	2019	0.0204255	105.849	0.21906	22	16.3373	7.88878	0.0608215	0.257548
50	Neimenggu	2020	0.0228933	62.5383	0.211811	30	19.76	2.02008	0.0684218	0.00146771
51	Liaoning	2011	0.0119531	57.6129	0.158672	12	13.355	0.0508229	0.0110676	0.0220157
52	Liaoning	2012	0.013818	28.2295	0.230174	23	12.8649	0	0.0130498	0.271736
53	Liaoning	2013	0.0205607	210.186	0.161707	19	14.1254	0.523109	0.0166675	0.0151663
54	Liaoning	2014	0.0168103	281.477	0.139684	12	12.5907	0.85864	0.0174107	0.187681
55	Liaoning	2015	0.0148315	327.638	0.153806	28	8.715	7.63236	0.0251556	0.522924
56	Liaoning	2016	0.0168585	255.5	0.154119	48	10.3343	50.1256	0.0306762	0.516748
57	Liaoning	2017	0.0140658	237.441	0.179793	54	8.7534	77.6315	0.0383577	0.632573
58	Liaoning	2018	0.0139542	168.997	0.145933	64	4.4888	45.6546	0.0349347	0.366555
59	Liaoning	2019	0.011865	190.885	0.154495	55	5.8749	20.0932	0.034028	0.590224
60	Liaoning	2020	0.013811	97.3934	0.181445	29	5.95	40.7894	0.0445231	0.627191
61	Jilin	2011	0.0109051	42.6452	0.163091	14	3.47914	0	0.00841754	0.00391389
62	Jilin	2012	0.0132939	14.1284	0.149066	11	3.3578	0.0340981	0.00868036	0.343071
63	Jilin	2013	0.0156904	152.882	0.139724	20	3.4413	0	0.0126194	0
64	Jilin	2014	0.0145246	201.195	0.145062	33	3.2494	0.367641	0.0127243	0.00146771
65	Jilin	2015	0.0157494	216.658	0.155178	12	3.0464	0.784946	0.015854	0.00146771
66	Jilin	2016	0.0134391	180.719	0.167208	36	3.6622	1.10942	0.0190584	0.684186
67	Jilin	2017	0.0138071	189.849	0.202043	67	2.8975	18.1272	0.0234913	0.626029
68	Jilin	2018	0.0199005	124.299	0.183832	28	1.345	7.81403	0.025554	0.425061
69	Jilin	2019	0.0138261	121.022	0.208429	21	1.558	7.41535	0.0277794	0.612514
70	Jilin	2020	0.0123773	67.6448	0.193928	31	1.48	7.47291	0.0322747	0.00782779
71	Heilongjiang	2011	0.0142966	37.2903	0.25109	3	4.37117	0	0.0125422	0.000489237
72	Heilongjiang	2012	0.0125	13.0656	0.258011	23	4.3321	0	0.0140285	0.00293542
73	Heilongjiang	2013	0.0175198	167.329	0.289654	21	4.6884	0.465334	0.0146166	0.00195695
74	Heilongjiang	2014	0.0141256	215.934	0.232372	26	3.4776	0.730753	0.0130303	0.00342466
75	Heilongjiang	2015	0.0104281	213.082	0.208081	35	3.4609	0.095627	0.0180862	0.00733855
76	Heilongjiang	2016	0.0146073	200.464	0.256836	71	4.2836	0.338072	0.0243519	0.00293542
77	Heilongjiang	2017	0.0126894	229.482	0.222425	73	3.7646	1.03527	0.043706	0.511183
78	Heilongjiang	2018	0.0181966	144.94	0.195444	82	1.6962	1.30204	0.0413261	0.896439
79	Heilongjiang	2019	0.0115385	144.044	0.226753	63	2.3286	0.0679556	0.0458908	0.683697
80	Heilongjiang	2020	0.0164751	78.7104	0.223156	24	2.27	0	0.059581	0.51265
81	Shanghai	2011	0.0130123	79.6129	0.297902	16	2.3497	0	0.0114684	0.0440313
82	Shanghai	2012	0.010989	44.9781	0.252832	23	1.8961	0	0.0120084	0.688957
83	Shanghai	2013	0.0149278	381.282	0.282759	48	2.2421	0	0.0133929	0.213121
84	Shanghai	2014	0.0174419	342.014	0.335387	50	1.7619	0	0.0144446	0.62869
85	Shanghai	2015	0.0141819	478.282	0.382592	27	2.3831	0	0.0158457	0.358116
86	Shanghai	2016	0.0150698	408.402	0.337059	86	3.5225	2.13418	0.0157851	0.0772994
87	Shanghai	2017	0.0138995	375.786	0.334857	82	6.5184	20.3267	0.0160403	0.567981
88	Shanghai	2018	0.0160869	272.567	0.345722	70	1.8078	38.7181	0.0128028	0.636748
89	Shanghai	2019	0.0158172	230.658	0.378333	78	2.2501	26.6074	0.0116047	0.469784
90	Shanghai	2020	0.017076	127.347	0.391242	85	1.95	7.93231	0.0126746	0.659597
91	Jiangsu	2011	0.0175797	72.2903	0.248929	26	20.0732	0.0109171	0.0100836	0.499627
92	Jiangsu	2012	0.0156607	40.0519	0.251705	38	19.0582	0	0.0115695	0.221624
93	Jiangsu	2013	0.022756	615.827	0.282857	60	19.9967	0.220991	0.017055	0.197162
94	Jiangsu	2014	0.0235756	447.732	0.252208	59	18.4006	0.05203	0.0158721	0.546105
95	Jiangsu	2015	0.0213713	578.784	0.244504	56	17.094	0.0272125	0.017915	0.498527
96	Jiangsu	2016	0.0222603	449.423	0.214333	79	22.338	2.18592	0.0240333	0.58133
97	Jiangsu	2017	0.0200877	426.712	0.208669	117	24.8151	31.4725	0.0301042	0.835402
98	Jiangsu	2018	0.0200566	396.474	0.187219	109	21.5222	70.5921	0.032232	0.620958
99	Jiangsu	2019	0.0185367	260.049	0.201826	71	35.8888	57.7709	0.0361041	0.77537
100	Jiangsu	2020	0.0182907	143.046	0.224688	56	35.24	86.2365	0.0438241	1.03032
101	Zhejiang	2011	0.0180983	76.4839	0.205891	90	9.54393	0.136598	0.0102257	0.623981
102	Zhejiang	2012	0.0173077	46.3934	0.216767	62	8.6262	1.07203	0.0111087	0.742405
103	Zhejiang	2013	0.0197614	578.967	0.213522	81	7.4605	2.28839	0.0177446	0.0303327
104	Zhejiang	2014	0.0250575	495.83	0.216555	109	9.4477	5.4034	0.0178706	0.680518
105	Zhejiang	2015	0.0203804	574.222	0.216454	87	8.2643	9.93019	0.0210635	0.436423
106	Zhejiang	2016	0.0246454	432.164	0.229036	90	9.3095	240.979	0.026043	0.440919
107	Zhejiang	2017	0.0168118	401.301	0.191932	104	8.0909	343.039	0.0321878	0.49767
108	Zhejiang	2018	0.0174271	293.06	0.166026	78	2.6388	93.9417	0.0320056	0.683883
109	Zhejiang	2019	0.0105705	228.984	0.161008	52	3.5101	58.1409	0.0326363	0.702474
110	Zhejiang	2020	0.0123535	131.552	0.172111	82	3.35	37.3544	0.0423815	0.888933
111	Anhui	2011	0.0158195	48.129	0.198455	15	4.71466	0.110163	0.00902765	0.652264
112	Anhui	2012	0.0151596	23.8142	0.216028	14	5.6879	0.178425	0.0107147	0.643067
113	Anhui	2013	0.0149165	241.789	0.254805	25	5.4315	0.171113	0.0186442	0.0376712
114	Anhui	2014	0.0174681	247.822	0.229863	92	5.6721	0.308385	0.0197786	0.074364
115	Anhui	2015	0.0153328	282.167	0.233725	75	5.301	0.296732	0.0269121	0.436373
116	Anhui	2016	0.0211964	207.992	0.241089	55	5.6198	0.460797	0.0305296	0.67954
117	Anhui	2017	0.0171184	227.929	0.237047	135	6.3507	4.74055	0.0400416	0.485041
118	Anhui	2018	0.0196839	197.036	0.200656	137	2.9543	8.49312	0.0404141	0.702044
119	Anhui	2019	0.0159597	157.674	0.171937	84	3.7237	6.5936	0.0400656	0.633981
120	Anhui	2020	0.0109624	97.5301	0.18569	48	3.22	4.26075	0.0559831	0.729442
121	Fujian	2011	0.0155258	44.2581	0.141663	45	3.79847	0.0174627	0.00639124	0.355792
122	Fujian	2012	0.00691244	20.6721	0.138601	27	3.4095	0	0.00837999	0.174166
123	Fujian	2013	0.0190776	260.17	0.161615	53	3.3691	0.274769	0.0122277	0.88263
124	Fujian	2014	0.0209044	294.088	0.127403	74	3.2094	3.10174	0.0126379	0.667798
125	Fujian	2015	0.019744	302.293	0.137122	71	3.8067	6.97773	0.0146248	0.0616438
126	Fujian	2016	0.0223714	244.342	0.123046	64	4.388	10.478	0.0171619	0.742111
127	Fujian	2017	0.0222363	232.06	0.125762	101	4.4431	24.0923	0.0209097	0.722034
128	Fujian	2018	0.0224248	164.449	0.11227	50	2.3434	25.9035	0.0217847	0.159491
129	Fujian	2019	0.0207054	150.512	0.0481914	56	3.188	36.7131	0.0239555	0.526978
130	Fujian	2020	0.0193659	91.0027	0.114451	37	3.14	48.7309	0.0288335	0.709872
131	Jiangxi	2011	0.021759	40.871	0.198067	21	6.37663	0	0.00366146	0.00978474
132	Jiangxi	2012	0.0220028	17.4863	0.220343	17	8.4307	0	0.00652002	0.00587084
133	Jiangxi	2013	0.0263255	154.682	0.18921	31	8.408	0.0535807	0.00994652	0.687611
134	Jiangxi	2014	0.019026	196.841	0.179586	20	8.5803	0	0.00671936	0.404348
135	Jiangxi	2015	0.0154639	213.178	0.182021	24	8.3618	0.0808515	0.0110204	0.00733855
136	Jiangxi	2016	0.0189467	185.934	0.221696	32	7.7582	0	0.0149674	0.580103
137	Jiangxi	2017	0.0223139	190.074	0.223764	38	8.4375	1.46982	0.0232132	0.652264
138	Jiangxi	2018	0.0236143	141.088	0.203323	29	2.3651	3.55829	0.0294039	0.0156556
139	Jiangxi	2019	0.019552	122.595	0.202326	26	3.2398	5.12577	0.0316838	0.646088
140	Jiangxi	2020	0.0183723	75.6967	0.269052	15	3.51	2.9962	0.0465781	0.721994
141	Shandong	2011	0.0181566	86.871	0.232822	57	13.9895	4.90835	0.00543957	0.400312
142	Shandong	2012	0.0123628	40.3497	0.261851	36	14.7638	4.1733	0.00624257	0.424285
143	Shandong	2013	0.017301	356.285	0.275657	64	15.8321	10.8855	0.013761	0.741794
144	Shandong	2014	0.0175595	385.605	0.255516	65	14.4588	17.1338	0.0121418	0.799646
145	Shandong	2015	0.0135795	524.679	0.218534	77	13.5649	20.9147	0.0166852	0.746076
146	Shandong	2016	0.0157433	491.292	0.227836	109	15.9245	25.0842	0.0235067	0.165362
147	Shandong	2017	0.0124611	439.781	0.276798	108	21.2579	91.022	0.0318887	0.744608
148	Shandong	2018	0.0150538	288.285	0.246249	85	14.0345	56.9533	0.0409499	0.696267
149	Shandong	2019	0.0135866	271.992	0.284799	106	19.3869	72.9899	0.048912	0.940057
150	Shandong	2020	0.0117906	143.298	0.284139	84	13.41	54.377	0.0623846	0.946906
151	Henan	2011	0.0149174	72	0.115166	75	9.28868	0	0.00265246	0.010274
152	Henan	2012	0.010303	36.8689	0.140863	70	10.439	0.210726	0.00226402	0.0215264
153	Henan	2013	0.0135003	452.225	0.156628	93	9.5414	1.03758	0.00682932	0.589398
154	Henan	2014	0.0172668	328.984	0.169086	107	8.1577	2.55935	0.0053134	0.714519
155	Henan	2015	0.0156272	457.466	0.201102	96	7.8961	2.62735	0.00916368	0.687978
156	Henan	2016	0.0146079	511.21	0.207119	178	8.6912	7.76948	0.0138381	0.37585
157	Henan	2017	0.0190977	461.364	0.217933	239	7.5118	10.3542	0.016725	0.371815
158	Henan	2018	0.0184928	285.915	0.177506	159	10.3101	22.5403	0.0241292	0.683873
159	Henan	2019	0.0185185	248.978	0.175323	106	10.6668	67.1693	0.0302706	0.469201
160	Henan	2020	0.0185827	137.814	0.177841	47	9.04	43.9362	0.037306	0.64725
161	Hubei	2011	0.0197289	57.871	0.207791	85	3.86727	0.098252	0.00596408	0.026908
162	Hubei	2012	0.0175537	57.347	0.212753	75	4.0146	0.197296	0.00777809	0.0410959
163	Hubei	2013	0.0128474	244.197	0.217065	96	4.0554	0.0701081	0.012711	0.0244618
164	Hubei	2014	0.0195863	285.847	0.202795	94	4.2401	0.164384	0.0101126	0.0283757
165	Hubei	2015	0.0172466	333.874	0.168428	55	5.1642	0.170463	0.0155002	0.33023
166	Hubei	2016	0.0166038	269.109	0.199102	66	5.9723	0.0696929	0.0195505	0.189332
167	Hubei	2017	0.0208076	276.54	0.206425	61	7.6231	0.368169	0.0261324	0.671344
168	Hubei	2018	0.0203177	202.359	0.169501	46	4.3894	3.24882	0.0252533	0.572643
169	Hubei	2019	0.0187751	183.438	0.130946	40	7.715	0.510789	0.0266113	0.532709
170	Hubei	2020	0.0131271	107.249	0.146043	40	5.84	1.69115	0.0404562	0.539558
171	Hunan	2011	0.0172112	52.871	0.334798	34	6.01532	0	0.00398114	0.493448
172	Hunan	2012	0.0160359	24.4262	0.375923	24	6.0083	0	0.00498631	0.464193
173	Hunan	2013	0.020205	192.233	0.293227	22	5.7008	0.163422	0.00958634	0.662198
174	Hunan	2014	0.0173697	258.293	0.256945	43	5.5605	0.0306477	0.00618665	0.367533
175	Hunan	2015	0.0189339	290.027	0.302528	30	5.2132	1.33909	0.0112824	0.36313
176	Hunan	2016	0.0185972	226.713	0.235878	39	4.9299	4.82892	0.016793	0.509288
177	Hunan	2017	0.0147544	237.97	0.241213	51	5.2102	20.5664	0.0267045	0.72675
178	Hunan	2018	0.0146247	181.282	0.218429	45	3.1284	16.6767	0.0265169	0.377991
179	Hunan	2019	0.0169159	165.748	0.218331	32	4.5456	15.2081	0.0250088	0.558149
180	Hunan	2020	0.0163125	95.7486	0.210874	39	4.17	8.96723	0.0347543	0.812648
181	Guangdong	2011	0.0177413	59.1613	0.119508	27	9.22639	83.1837	0.00490582	0.689451
182	Guangdong	2012	0.0218082	36.8716	0.113904	34	8.7351	30.6204	0.00587631	0.766751
183	Guangdong	2013	0.022391	389.345	0.124739	33	9.2938	124.515	0.00921078	0.715753
184	Guangdong	2014	0.0202145	539.395	0.121334	56	8.5635	118.042	0.00918713	0.399217
185	Guangdong	2015	0.0167984	652.296	0.121356	48	7.1211	100.203	0.00977153	0.924774
186	Guangdong	2016	0.0219972	539.792	0.129034	59	7.8255	199.57	0.0107718	1.04708
187	Guangdong	2017	0.0158501	533.425	0.125937	96	7.6721	327.642	0.0136657	1.48629
188	Guangdong	2018	0.0169588	314.274	0.117364	125	5.0233	365.047	0.0213274	1.32452
189	Guangdong	2019	0.0133094	262.068	0.107523	103	6.5731	394.305	0.0285117	1.56555
190	Guangdong	2020	0.0168859	146.831	0.144573	102	6.29	348.91	0.0314073	1.60469
191	Guangxi	2011	0.0208257	45.8065	0.107664	19	2.63944	0	0.00770533	0.683208
192	Guangxi	2012	0.0156902	14.918	0.116365	33	2.6996	0.117258	0.0098798	0.00538161
193	Guangxi	2013	0.0181173	156.945	0.124026	26	2.7562	0.83508	0.0181095	0.00293542
194	Guangxi	2014	0.015795	202.532	0.117789	33	2.3481	1.74779	0.0164023	0.00684931
195	Guangxi	2015	0.0172923	200.112	0.167868	66	2.2695	4.39825	0.0235631	0.00195695
196	Guangxi	2016	0.0206057	163.795	0.143897	79	3.6256	10.4861	0.0292525	0.00587084
197	Guangxi	2017	0.0169945	170.953	0.143158	134	3.5203	15.0421	0.0346149	0.345028
198	Guangxi	2018	0.0153001	132.578	0.116688	315	2.8133	58.6959	0.0378289	0.0176125
199	Guangxi	2019	0.0189174	117.37	0.111144	236	3.8799	99.1224	0.0422543	0.22894
200	Guangxi	2020	0.0129317	74.5847	0.170498	124	4.19	31.0524	0.0533564	0.676451
201	Hainan	2011	0.0116662	20.4194	0.132853	3	0.34689	0	0.0204508	0
202	Hainan	2012	0.011893	3.77049	0.154999	7	0.353	0.0108642	0.0188159	0
203	Hainan	2013	0.0163371	96.4603	0.126755	8	0.4516	0.0213018	0.0294357	0
204	Hainan	2014	0.0150983	130.115	0.132129	16	0.435	0.0339401	0.0164629	0
205	Hainan	2015	0.0171357	131.184	0.131301	41	0.4443	0.0579268	0.0182597	0
206	Hainan	2016	0.0198633	118.426	0.10952	41	0.5713	2.00449	0.0248705	0
207	Hainan	2017	0.0238814	136.921	0.146389	55	0.4457	10.8085	0.087075	0
208	Hainan	2018	0.0219631	98.0767	0.136644	41	0.5001	6.17768	0.0876228	0
209	Hainan	2019	0.0170063	82.274	0.101758	20	0.6237	1.39816	0.107048	0.980081
210	Hainan	2020	0.0146426	41.5301	0.122016	8	0.83	1.12191	0.159664	0.761036
211	Chongqing	2011	0.0193411	38.2581	0.37388	20	3.71708	0	0.0102696	0.0166341
212	Chongqing	2012	0.0139005	11.5765	0.291986	7	3.6342	0	0.0128163	0.32338
213	Chongqing	2013	0.0216871	144.521	0.291497	12	3.8602	0	0.0157046	0.0156556
214	Chongqing	2014	0.0166098	184.356	0.247754	12	3.5598	0	0.0122908	0.0146771
215	Chongqing	2015	0.0212409	224.055	0.239784	4	3.9147	0.284213	0.0163658	0.0156556
216	Chongqing	2016	0.0268897	193.445	0.206761	14	4.0267	4.37562	0.0228963	0.594275
217	Chongqing	2017	0.0202341	230.066	0.219335	15	4.0337	6.76858	0.0274088	0.62181
218	Chongqing	2018	0.0228112	144.23	0.202019	4	2.1412	7.69535	0.0288764	0.56877
219	Chongqing	2019	0.0190391	133.036	0.1854	10	2.8694	8.09909	0.0320521	0.487578
220	Chongqing	2020	0.018506	80.0328	0.185166	18	2.71	3.48087	0.0337588	0.646134
221	Sichuan	2011	0.016174	44.9677	0.132649	21	6.05494	1.27192	0.00520257	0.480682
222	Sichuan	2012	0.0128459	17.9536	0.150615	49	5.5326	8.81953	0.00542062	0.367044
223	Sichuan	2013	0.0147924	219.479	0.17955	60	7.3309	16.3915	0.00834223	0.703755
224	Sichuan	2014	0.0163751	279.129	0.176114	39	5.4842	9.42777	0.00710026	0.564766
225	Sichuan	2015	0.0181658	419.468	0.178144	33	4.9261	16.9554	0.00838378	0.715008
226	Sichuan	2016	0.0156666	530.574	0.175583	55	5.6138	46.4285	0.0116765	0.635997
227	Sichuan	2017	0.016055	454.578	0.16322	76	6.5411	203.412	0.0193219	0.759738
228	Sichuan	2018	0.0209033	250.915	0.151317	42	4.8552	101.556	0.0225727	0.711094
229	Sichuan	2019	0.0179186	200.622	0.122794	30	6.0598	51.3031	0.0290143	0.584842
230	Sichuan	2020	0.014288	128.691	0.129087	28	5.86	39.2476	0.0307439	0.71354
231	Guizhou	2011	0.0160572	30	0.0861894	40	4.4454	0	0.0120684	0
232	Guizhou	2012	0.0111255	8.59016	0.08147	77	5.1209	0	0.011895	0.607133
233	Guizhou	2013	0.0175209	115.132	0.113513	107	5.4499	0	0.0232902	0.00195695
234	Guizhou	2014	0.0161633	151.748	0.153874	120	4.3641	0	0.026406	0.680761
235	Guizhou	2015	0.0174081	166.192	0.120812	44	3.6926	0.0297046	0.0297251	0.605176
236	Guizhou	2016	0.0185558	147.161	0.0988979	34	4.3898	0	0.0334125	0.454493
237	Guizhou	2017	0.0174506	152.953	0.127694	71	4.9461	1.08146	0.0361124	0.530079
238	Guizhou	2018	0.0155928	111.271	0.0726153	40	4.5741	5.5692	0.0352901	0.655352
239	Guizhou	2019	0.0202257	101.126	0.0686094	18	6.3484	6.60078	0.0352099	0.000489237
240	Guizhou	2020	0.0151188	58.6202	0.0777066	15	5.94	2.7795	0.0394325	0.745643
241	Yunnan	2011	0.0177353	26.7419	0.147713	13	3.15648	0.03297	0.0097514	1.00587
242	Yunnan	2012	0.0135473	6.98907	0.14633	11	3.6399	0	0.00983876	0.686143
243	Yunnan	2013	0.0150777	128.192	0.165601	35	3.5773	0	0.0166521	0.438869
244	Yunnan	2014	0.0151238	175.616	0.133564	40	3.4721	0	0.0146878	0.690057
245	Yunnan	2015	0.0160881	191.948	0.130596	31	1.8913	0.597786	0.0222522	0.528306
246	Yunnan	2016	0.0246993	165.005	0.133472	23	2.1846	0.336126	0.0261771	0.690546
247	Yunnan	2017	0.0166153	167.34	0.124005	31	2.0286	1.22907	0.0379499	0.620613
248	Yunnan	2018	0.019826	124.816	0.0893555	37	2.1337	0.316812	0.0423478	0.631411
249	Yunnan	2019	0.015077	121.041	0.0914713	37	4.9588	0.0519839	0.0435149	0.517053
250	Yunnan	2020	0.0136116	68.4563	0.0887313	14	5.88	0	0.0598632	0.684354
251	Shanxi	2011	0.0155431	66.3871	0.217201	25	5.19414	0.318396	0.00979341	0.609579
252	Shanxi	2012	0.015942	26.8552	0.202725	46	5.4654	0	0.0110681	0.00391389
253	Shanxi	2013	0.0181541	248.17	0.207229	67	6.0185	0.0619191	0.0132738	0.684186
254	Shanxi	2014	0.0211212	270.523	0.191027	64	6.2066	0.213479	0.0107437	0.0092955
255	Shanxi	2015	0.0171523	327.123	0.187874	47	5.8927	0.488686	0.0161897	0.684675
256	Shanxi	2016	0.0186993	428.792	0.197302	105	5.7244	0.558101	0.019372	0.350899
257	Shanxi	2017	0.0171269	523.049	0.179229	222	5.453	3.60498	0.0240499	0.528306
258	Shanxi	2018	0.0185727	311.315	0.135268	314	3.2931	11.0662	0.0308095	0.358238
259	Shanxi	2019	0.0151824	296.46	0.173552	172	4.7726	5.11168	0.0359413	0.708159
260	Shanxi	2020	0.0165403	135.929	0.181962	65	4.14	0.870485	0.0506766	0.523553
261	Gansu	2011	0.0136848	32.8065	0.0949758	10	2.62961	0	0.00513558	0.360195
262	Gansu	2012	0.0136535	8.04372	0.182061	22	2.3296	0.0559089	0.00711879	0.354813
263	Gansu	2013	0.0175303	95.9068	0.234861	28	2.3283	0.0485829	0.0132591	0.653732
264	Gansu	2014	0.0173465	135.534	0.197669	44	1.9657	0.157592	0.0138988	0.229429
265	Gansu	2015	0.0168582	144.307	0.193599	43	2.311	0.0278585	0.0260885	0.312128
266	Gansu	2016	0.0198304	135.096	0.184881	41	2.7389	0.452575	0.0305688	0.284782
267	Gansu	2017	0.0163978	137.132	0.155445	72	2.2305	4.98342	0.0301905	0.348453
268	Gansu	2018	0.0182053	104.814	0.140768	53	1.4236	4.45221	0.0430461	0.402921
269	Gansu	2019	0.0185602	95.6685	0.155165	29	2.1505	3.46185	0.0512986	0.310171
270	Gansu	2020	0.0189066	49.888	0.151621	27	2.26	1.01038	0.0644481	0.517543
271	Qinghai	2011	0.0168849	1.83871	0.16132	16	0.63699	0.0400992	0.012038	0
272	Qinghai	2012	0.0120202	1.41803	0.154586	7	0.676	0.0127683	0.00864491	0.907519
273	Qinghai	2013	0.0179913	47.0411	0.202265	24	0.6947	0.035047	0.0478069	0.000489237
274	Qinghai	2014	0.0237938	68.5781	0.175052	21	0.7347	0	0.0555005	0
275	Qinghai	2015	0.0245315	68.5452	0.231902	25	0.7463	0	0.0677769	0.454493
276	Qinghai	2016	0.0257221	70.7158	0.271679	22	0.8885	0	0.0837002	0.000489237
277	Qinghai	2017	0.0253942	74.2904	0.234889	40	0.808	0	0.124422	0.669524
278	Qinghai	2018	0.0253342	50.6219	0.237248	27	0.619	0	0.101605	0.517543
279	Qinghai	2019	0.0272683	44.3151	0.315423	8	0.844	0	0.11072	0.553868
280	Qinghai	2020	0.0279639	17.3033	0.29556	17	0.82	0	0.132536	0.459875
281	Ningxia	2011	0.0149835	20.4194	0.222375	2	1.58797	0	0.0119811	0.000978474
282	Ningxia	2012	0.0123421	4.7623	0.212702	10	1.7796	0	0.0112226	0.644436
283	Ningxia	2013	0.0132439	64.9781	0.256875	7	1.6933	0	0.0200884	0.348453
284	Ningxia	2014	0.0166876	95.074	0.272951	9	2.5933	0	0.0170271	0.341604
285	Ningxia	2015	0.015408	87.8932	0.394507	10	2.015	0	0.0240077	0
286	Ningxia	2016	0.0172987	81.1503	0.321174	18	2.2395	0	0.0270142	0.000489237
287	Ningxia	2017	0.0132398	86.4301	0.332362	49	2.8054	0.0915415	0.0354227	0
288	Ningxia	2018	0.0204413	65.3233	0.214103	45	1.2226	2.62892	0.0453416	0.259994
289	Ningxia	2019	0.015801	58.4274	0.1715	14	1.6437	1.32031	0.0557979	0.220622
290	Ningxia	2020	0.0195477	26.7432	0.205012	16	1.57	1.56299	0.0650578	0.626518
291	Xinjiang	2011	0.0167209	36	0.211023	19	3.58499	0	0.00551694	0.00391389
292	Xinjiang	2012	0.0157754	7.30601	0.292172	19	4.6912	0	0.00696088	0.682229
293	Xinjiang	2013	0.0201057	91.4767	0.33061	28	6.4443	0	0.0179564	0.684186
294	Xinjiang	2014	0.017926	123.512	0.353202	25	6.7433	0	0.0199302	0.343561
295	Xinjiang	2015	0.0143418	133.455	0.279009	12	4.9166	0	0.0335631	0.683697
296	Xinjiang	2016	0.0174973	122.97	0.281666	8	5.9969	3.1961	0.0387078	0.00538161
297	Xinjiang	2017	0.0156787	118.041	0.295253	25	6.1756	4.83683	0.040109	0.235564
298	Xinjiang	2018	0.0177063	94.2192	0.14242	12	3.3075	4.446	0.0401756	0.0117417
299	Xinjiang	2019	0.0159341	90.5808	0.174318	5	4.6297	0.491554	0.0433307	0.0278865
300	Xinjiang	2020	0.0146919	46.5683	0.20417	7	4.38	0	0.0569725	0.0264188

## Sheet: DEMATEL data
	Government								University								Enterprise
	GE	ME	SE	CP	MP	AS	IS		GE	ME	SE	CP	MP	AS	IS		GE	ME	SE	CP	MP	AS	IS
GE	-	M	L	H	M	M	L		-	M	M	M	M	L	L		-	L	L	M	M	M	L
ME	L	-	VL	VL	M	CL	H		VL	-	VL	VL	M	VL	M		M	-	L	L	M	VL	M
SE	H	M	-	M	L	H	M		M	M	-	M	M	M	M		H	M	-	L	L	H	M
CP	H	VH	VH	-	H	VH	H		H	H	H	-	H	VH	VH		H	H	M	-	M	VH	M
MP	M	VH	M	H	-	L	M		H	H	H	M	-	M	H		M	H	L	M	-	M	M
AS	VH	M	H	H	L	-	H		H	M	H	H	M	-	M		H	H	H	H	L	-	H
IS	VL	M	M	L	L	M	-		VL	L	L	VL	VL	M	-		VL	H	M	VL	L	M	-
