# Supplementary material for: From Compliance Pressure to Innovation Motivation: Configurational Paths and Causal Mechanisms of Environmental Governance in Enhancing Firm Green Technology Innovation Capability
Source: Research Square preprint supplement (doi:10.21203/rs.3.rs-8017927/v1), 2026-01-21
Supplement: Supplementary file 2 [file a2cd818961f67eedafbd1593.docx]

Table 1 Linguistic scales and fuzzy ratings

| Linguistic Terms | Linguistic Values |
| --- | --- |
| Very low（VL） | (1,1,3) |
| Low（L） | (1,3,5) |
| Medium（M） | (3,5,7) |
| High（H） | (5,7,9) |
| Very high（VH） | (7,9,9) |

Table 2 Initial influence matrix for the environmental governance elements

|  | Government | | | | | | |  | University | | | | | | |  | Enterprise | | | | | | |
| --- | --- | --- | --- | --- | --- | --- | --- | --- | --- | --- | --- | --- | --- | --- | --- | --- | --- | --- | --- | --- | --- | --- | --- |
|  | GE | ME | SE | CP | MP | AS | IS |  | GE | ME | SE | CP | MP | AS | IS |  | GE | ME | SE | CP | MP | AS | IS |
| GE | - | M | L | H | M | M | L |  | - | M | M | M | M | L | L |  | - | L | L | M | M | M | L |
| ME | L | - | VL | VL | M | CL | H |  | VL | - | VL | VL | M | VL | M |  | M | - | L | L | M | VL | M |
| SE | H | M | - | M | L | H | M |  | M | M | - | M | M | M | M |  | H | M | - | L | L | H | M |
| CP | H | VH | VH | - | H | VH | H |  | H | H | H | - | H | VH | VH |  | H | H | M | - | M | VH | M |
| MP | M | VH | M | H | - | L | M |  | H | H | H | M | - | M | H |  | M | H | L | M | - | M | M |
| AS | VH | M | H | H | L | - | H |  | H | M | H | H | M | - | M |  | H | H | H | H | L | - | H |
| IS | VL | M | M | L | L | M | - |  | VL | L | L | VL | VL | M | - |  | VL | H | M | VL | L | M | - |

Table 3 Calibration point statistics

| **Variable** | **Fuzzy set calibration** | | |
| --- | --- | --- | --- |
| **Full in** | **Crossover point** | **Full out** |
| **Green Technology Innovation Capabilities** | 0.947 | 0.491 | 0 |
| ***Actor Engagement*** |  |  |  |
| Government Engagement | 0.024 | 0.017 | 0.012 |
| Market Engagement | 0.365 | 0.198 | 0.111 |
| Social engagement | 530.716 | 155.814 | 17.930 |
| ***Environmental Policy*** |  |  |  |
| Command-and-Control Policies | 124.05 | 40 | 7 |
| Market-based Policies | 18.433 | 4.703 | 0.694 |
| ***Regulatory Enforcement*** |  |  |  |
| Administrative Supervision | 102.380 | 1.226 | 0 |
| Institutional Supervision | 0.065 | 0.022 | 0.006 |

Table 4 Overview of necessary condition

| **Condition** | **CGTIC** | | | | **~ CGTIC** | | | |
| --- | --- | --- | --- | --- | --- | --- | --- | --- |
| **Pooled**  **Consistency** | **Pooled**  **Coverage** | **Adjusted Between-Consistency Distance** | **Adjusted Within-Consistency Distance** | **Pooled**  **Consistency** | **Pooled**  **Coverage** | **Adjusted** **Between-Consistency Distance** | **Adjusted Within-Consistency Distance** |
| GE | 0.653 | 0.619 | 0.247 | 0.305 | 0.618 | 0.670 | 0.276 | 0.322 |
| ～GE | 0.652 | 0.599 | 0.211 | 0.339 | 0.648 | 0.681 | 0.211 | 0.316 |
| ME | 0.606 | 0.622 | 0.127 | 0.472 | 0.591 | 0.693 | 0.160 | 0.500 |
| ~ME | 0.701 | 0.600 | 0.076 | 0.374 | 0.678 | 0.663 | 0.160 | 0.380 |
| SE | 0.663 | 0.665 | 0.505 | 0.288 | 0.553 | 0.633 | 0.487 | 0.374 |
| ~SE | 0.634 | 0.553 | 0.396 | 0.345 | 0.708 | 0.706 | 0.334 | 0.299 |
| CP | 0.668 | 0.661 | 0.269 | 0.391 | 0.560 | 0.633 | 0.262 | 0.489 |
| ~CP | 0.629 | 0.556 | 0.287 | 0.403 | 0.700 | 0.707 | 0.185 | 0.362 |
| MP | 0.650 | 0.653 | 0.131 | 0.431 | 0.581 | 0.667 | 0.145 | 0.500 |
| ~MP | 0.668 | 0.582 | 0.080 | 0.403 | 0.698 | 0.695 | 0.116 | 0.408 |
| AS | 0.626 | 0.773 | 0.403 | 0.385 | 0.400 | 0.565 | 0.661 | 0.552 |
| ~AS | 0.647 | 0.486 | 0.291 | 0.362 | 0.839 | 0.720 | 0.182 | 0.213 |
| IS | 0.653 | 0.669 | 0.490 | 0.288 | 0.534 | 0.625 | 0.603 | 0.339 |
| ~IS | 0.633 | 0.543 | 0.411 | 0.334 | 0.717 | 0.703 | 0.338 | 0.276 |

Table 5 Variable configuration with between-group consistency distance>0.2

| **Configuration** | |  | **2011** | **2012** | **2013** | **2014** | **2015** | **2016** | **2017** | **2018** | **2019** | **2020** |
| --- | --- | --- | --- | --- | --- | --- | --- | --- | --- | --- | --- | --- |
| GE*GTIC | Between consistency | | 0.665 | 0.363 | 0.726 | 0.791 | 0.637 | 0.868 | 0.679 | 0.794 | 0.602 | 0.493 |
| Between coverage | | 0.617 | 0.646 | 0.547 | 0.465 | 0.486 | 0.558 | 0.764 | 0.63 | 0.745 | 0.813 |
| ~GE*GTIC | Between consistency | | 0.758 | 0.880 | 0.551 | 0.637 | 0.755 | 0.457 | 0.629 | 0.511 | 0.671 | 0.704 |
| Between coverage | | 0.441 | 0.437 | 0.447 | 0.511 | 0.565 | 0.534 | 0.764 | 0.775 | 0.805 | 0.821 |
| SE*GTIC | Between consistency | | 0.239 | 0.137 | 0.755 | 0.934 | 0.922 | 0.917 | 0.900 | 0.797 | 0.737 | 0.330 |
| Between coverage | | 0.853 | 0.952 | 0.517 | 0.486 | 0.498 | 0.574 | 0.788 | 0.792 | 0.938 | 0.930 |
| ～SE*GTIC | Between consistency | | 0.987 | 0.995 | 0.555 | 0.463 | 0.419 | 0.439 | 0.411 | 0.585 | 0.614 | 0.857 |
| Between coverage | | 0.392 | 0.409 | 0.506 | 0.451 | 0.528 | 0.540 | 0.721 | 0.641 | 0.718 | 0.772 |
| CP*GTIC | Between consistency | | 0.398 | 0.451 | 0.575 | 0.849 | 0.733 | 0.766 | 0.843 | 0.809 | 0.680 | 0.534 |
| Between coverage | | 0.559 | 0.589 | 0.533 | 0.579 | 0.600 | 0.565 | 0.694 | 0.691 | 0.853 | 0.875 |
| ～CP*GTIC | Between consistency | | 0.935 | 0.876 | 0.731 | 0.565 | 0.700 | 0.611 | 0.378 | 0.470 | 0.581 | 0.653 |
| Between coverage | | 0.449 | 0.484 | 0.495 | 0.382 | 0.491 | 0.578 | 0.758 | 0.627 | 0.689 | 0.765 |
| AS*GTIC | Between consistency | | 0.290 | 0.313 | 0.365 | 0.483 | 0.537 | 0.647 | 0.818 | 0.847 | 0.799 | 0.753 |
| Between coverage | | 0.909 | 0.899 | 0.805 | 0.743 | 0.701 | 0.631 | 0.803 | 0.684 | 0.803 | 0.896 |
| ～AS*GTIC | Between consistency | | 0.932 | 0.888 | 0.817 | 0.800 | 0.792 | 0.678 | 0.528 | 0.503 | 0.469 | 0.460 |
| Between coverage | | 0.376 | 0.399 | 0.388 | 0.348 | 0.421 | 0.489 | 0.762 | 0.738 | 0.726 | 0.736 |
| IS*GTIC | Between consistency | | 0.212 | 0.238 | 0.383 | 0.418 | 0.631 | 0.667 | 0.777 | 0.858 | 0.911 | 0.904 |
| Between coverage | | 0.696 | 0.803 | 0.541 | 0.567 | 0.611 | 0.545 | 0.706 | 0.639 | 0.747 | 0.749 |
| ～IS*GTIC | Between consistency | | 0.939 | 0.945 | 0.901 | 0.913 | 0.823 | 0.758 | 0.550 | 0.484 | 0.377 | 0.238 |
| Between coverage | | 0.377 | 0.415 | 0.487 | 0.413 | 0.510 | 0.638 | 0.899 | 0.839 | 0.895 | 0.922 |

Table 6 High firm green technology innovation capabilities configuration

|  | **Regulatory Interactive**  **Governance Model** | | **Collaborative Interactive**  **Governance Model** | | **Holistic Interactive Governance Model** |
| --- | --- | --- | --- | --- | --- |
| **C1a** | **C1b** | **C2a** | **C2b** | **C3** |
| ***Actor Engagement*** |  |  |  |  |  |
| Government Engagement |  |  |  |  | ● |
| Market Engagement |  |  |  |  | ● |
| Social engagement |  |  | ● | ● | ● |
| ***Environmental Policy*** |  |  |  |  |  |
| Command-and-Control Policy | ● | ● | ● | ● | ● |
| Market-based Policy | ● | ● | ● | ● |  |
| ***Regulatory Enforcement*** |  |  |  |  |  |
| Administrative Supervision | ● | ● | ● | ● | ● |
| Institutional Supervision |  | ● |  |  | ● |
| Consistency | 0.931 | 0.926 | 0.921 | 0.907 | 0.909 |
| PRI | 0.766 | 0.756 | 0.771 | 0.691 | 0.690 |
| Coverage | 0.290 | 0.272 | 0.307 | 0.276 | 0.245 |
| BECON distance | 0.065 | 0.098 | 0.084 | 0.102 | 0.084 |
| WICON distance | 0.065 | 0.062 | 0.073 | 0.094 | 0.076 |
| Overall PRI | 0.756 | | | | |
| Overall Consistency | 0.926 | | | | |
| Overall Coverage | 0.272 | | | | |

Table 7 Average fuzzy direct-relation matrix

|  | GE | ME | SE | CP | MP | AS | IS |
| --- | --- | --- | --- | --- | --- | --- | --- |
| GE | (0,0,0) | (2.3333,4.3333,6.3333) | (1.6667,3.6667,5.6667) | (3.6667,5.6667,7.6667) | (3,5,7) | (2.3333,4.3333,6.3333) | (1,3,5) |
| ME | (1.6667,3,5) | (0,0,0) | (1,1.6667,3.6667) | (1,1.6667,3.6667) | (3,5,7) | (1,1,3) | (3.6667,5.6667,7.6667) |
| SE | (4.3333,6.3333,8.3333) | (3,5,7) | (0,0,0) | (2.3333,4.3333,6.3333) | (1.6667,3.6667,5.6667) | (4.3333,6.3333,8.3333) | (3,5,7) |
| CP | (5,7,9) | (5.6667,7.6667,9) | (5,7,8.3333) | (0,0,0) | (4.3333,6.3333,8.3333) | (7,9,9) | (5,7,8.3333) |
| MP | (3.6667,5.6667,7.6667) | (5.6667,7.6667,9) | (3,5,7) | (3.6667,5.6667,7.6667) | (0,0,0) | (2.3333,4.3333,6.3333) | (3.6667,5.6667,7.6667) |
| AS | (5.6667,7.6667,9) | (3.6667,5.6667,7.6667) | (5,7,9) | (5,7,9) | (1.6667,3.6667,5.6667) | (0,0,0) | (4.3333,6.3333,8.3333) |
| IS | (1,1,3) | (3,5,7) | (2.3333,4.3333,6.3333) | (1,1.6667,3.6667) | (1,2.3333,4.3333) | (3,5,7) | (0,0,0) |

Table 8 Normalized fuzzy direct-relation matrix

|  | GE | ME | SE | CP | MP | AS | IS |
| --- | --- | --- | --- | --- | --- | --- | --- |
| GE | (0,0,0) | (0.0449,0.0833,0.1218) | (0.0321,0.0705,0.1090) | (0.0705,0.1090,0.1474) | (0.0577,0.0962,0.1346) | (0.0449,0.0833,0.1218) | (0.0192,0.0577,0.0962) |
| ME | (0.0321,0.0577,0.0962) | (0,0,0) | (0.0192,0.0321,0.0705) | (0.0192,0.0321,0.0705) | (0.0577,0.0962,0.1346) | (0.0192,0.0192,0.0577) | (0.0705,0.1090,0.1474) |
| SE | (0.0833,0.1218,0.1603) | (0.0577,0.0962,0.1346) | (0,0,0) | (0.0449,0.0833,0.1218) | (0.0321,0.0705,0.1090) | (0.0833,0.1218,0.1603) | (0.0577,0.0962,0.1346) |
| CP | (0.0962,0.1346,0.1731) | (0.1090,0.1474,0.1731) | (0.0962,0.1346,0.1603) | (0,0,0) | (0.0833,0.1218,0.1603) | (0.1346,0.1731,0.1731) | (0.0962,0.1346,0.1603) |
| MP | (0.0705,0.1090,0.1474) | (0.1090,0.1474,0.1731) | (0.0577,0.0962,0.1346) | (0.0705,0.1090,0.1474) | (0,0,0) | (0.0449,0.0833,0.1218) | (0.0705,0.1090,0.1474) |
| AS | (0.1090,0.1474,0.1731) | (0.0705,0.1090,0.1474) | (0.0962,0.1346,0.1731) | (0.0962,0.1346,0.1731) | (0.0321,0.0705,0.1090) | (0,0,0) | (0.0833,0.1218,0.1603) |
| IS | (0.0192,0.0192,0.0577) | (0.0577,0.0962,0.1346) | (0.0449,0.0833,0.1218) | (0.0192,0.0321,0.0705) | (0.0192,0.0449,0.0833) | (0.0577,0.0962,0.1346) | (0,0,0) |

Table 9 Fuzzy total-relation matrix

|  | GE | ME | SE | CP | MP | AS | IS |
| --- | --- | --- | --- | --- | --- | --- | --- |
| GE | (0.0297,0.1068,0.4068) | (0.0753,0.1987,0.5521) | (0.0564,0.1657,0.4880) | (0.0897,0.1902,0.5011) | (0.0762,0.1807,0.4944) | (0.0706,0.1804,0.4977) | (0.0483,0.1687,0.5153) |
| ME | (0.0498,0.1177,0.3979) | (0.0233,0.0794,0.3444) | (0.0361,0.0948,0.3676) | (0.0350,0.0884,0.3528) | (0.0689,0.1463,0.4084) | (0.0377,0.0861,0.3577) | (0.0866,0.1719,0.4600) |
| SE | (0.1133,0.2282,0.5814) | (0.0913,0.2225,0.6013) | (0.0301,0.1118,0.4252) | (0.0722,0.1802,0.5152) | (0.0561,0.1691,0.5072) | (0.1100,0.2246,0.5635) | (0.0881,0.2144,0.5840) |
| CP | (0.1479,0.2846,0.6743) | (0.1626,0.3181,0.7229) | (0.1389,0.2749,0.6435) | (0.0479,0.1429,0.4827) | (0.1181,0.2517,0.6247) | (0.1761,0.3106,0.6529) | (0.1461,0.2966,0.6924) |
| MP | (0.1045,0.2242,0.5900) | (0.1442,0.2775,0.6545) | (0.0872,0.2061,0.5617) | (0.0964,0.2063,0.5512) | (0.0298,0.1126,0.4286) | (0.0800,0.2003,0.5520) | (0.1058,0.2364,0.6162) |
| AS | (0.1476,0.2727,0.6461) | (0.1158,0.2605,0.6715) | (0.1290,0.2539,0.6265) | (0.1260,0.2421,0.6040) | (0.0657,0.1908,0.5588) | (0.0466,0.1415,0.4795) | (0.1224,0.2609,0.6618) |
| IS | (0.0411,0.0970,0.3892) | (0.0772,0.1738,0.4820) | (0.0612,0.1474,0.4277) | (0.0363,0.0963,0.3709) | (0.0338,0.1080,0.3836) | (0.0738,0.1592,0.4367) | (0.0218,0.0828,0.3520) |

Table 10 Causal relationships and influence rankings of environmental governance elements

|  |  |  |  |  | *E()* | *E()* |  |  | Type |
| --- | --- | --- | --- | --- | --- | --- | --- | --- | --- |
| CP | (0.9376,1.8795,4.4933) | (0.5034,1.1463,3.3780) | (1.4410,3.0257,7.8712) | (0.4342,0.7332,1.1153) | 3.8409 | 0.7540 | 3.9142 | 0.1619 | Cause factor |
| AS | (0.7532,1.6223,4.2483 | (0.5949,1.3028,3.5399) | (1.3481,2.9252,7.7882) | (0.1584,0.3196,0.7084) | 3.7467 | 0.3765 | 3.7655 | 0.1557 | Cause factor |
| MP | (0.6479,1.4635,3.9541) | (0.4486,1.1594,3.4056) | (1.0965,2.6228,7.3597) | (0.1993,0.3041,0.5485) | 3.4255 | 0.3390 | 3.4422 | 0.1424 | Cause factor |
| SE | (0.5611,1.3508,3.7778) | (0.5390,1.2547,3.5402) | (1.1001,2.6055,7.3180) | (0.0221,0.0962,0.2376) | 3.4073 | 0.1130 | 3.4091 | 0.1410 | Cause factor |
| GE | (0.4463,1.1912,3.4554) | (0.6340,1.3311,3.6858) | (1.0803,2.5224,7.1412) | (-0.1878,-0.1399,-0.2304) | 3.3165 | -0.1745 | 3.3211 | 0.1374 | Effect factor |
| ME | (0.3374,0.7846,2.6889) | (0.6900,1.5306,4.0286) | (1.0269,2.3152,6.7174) | (-0.3524,-0.7461,-1.3398) | 3.0937 | -0.7961 | 3.1945 | 0.1321 | Effect factor |
| IS | (0.3451,0.8646,2.8422) | (0.6190,1.4318,3.8818) | (0.9641,2.2964,6.7240) | (-0.2738,-0.5671,-1.0396) | 3.0702 | -0.6119 | 3.1306 | 0.1295 | Effect factor |
